# Supplementary material for: Natural Radioactivity and Radiological Hazard Effects from Granite Rocks in the Gabal Qash Amir Area, South Eastern Desert, Egypt
Source: MDPI journal article supplement (doi:10.3390/min12070884), 2022-07-14
Supplement: s1 [file s1]

**Table S1.** The concentrations of radionuclides  $^{238}\text{U}$ ,  $^{232}\text{Th}$ ,  $^{40}\text{K}$  and the radiological hazard indices.

| Samples.<br>No | U-238<br>(Bq/kg) | Th-232<br>(Bq/kg) | K-40<br>(Bq/kg) | Ra <sub>eq</sub><br>(Bq/kg) | H <sub>in</sub> | H <sub>ex</sub> | I <sub>γ</sub> | D <sub>air</sub><br>(nG/h) | AED <sub>out</sub><br>(mSv) | AED <sub>in</sub><br>(mSv) | AGDE<br>(mSv) | ELCR   | $^{238}\text{U}/^{232}\text{Th}$ |
|----------------|------------------|-------------------|-----------------|-----------------------------|-----------------|-----------------|----------------|----------------------------|-----------------------------|----------------------------|---------------|--------|----------------------------------|
| S1             | 26               | 21                | 407             | 87                          | 0.3             | 0.2             | 0.3            | 41.4                       | 0.05                        | 0.2                        | 0.3           | 0.0002 | 1.2                              |
| S2             | 46               | 30                | 689             | 141                         | 0.5             | 0.4             | 0.5            | 67.2                       | 0.08                        | 0.3                        | 0.5           | 0.0003 | 1.5                              |
| S3             | 32               | 28                | 532             | 113                         | 0.4             | 0.3             | 0.4            | 53.3                       | 0.07                        | 0.3                        | 0.4           | 0.0002 | 1.2                              |
| S4             | 38               | 22                | 501             | 109                         | 0.4             | 0.3             | 0.4            | 51.7                       | 0.06                        | 0.3                        | 0.4           | 0.0002 | 1.7                              |
| S5             | 25               | 11                | 376             | 69                          | 0.3             | 0.2             | 0.3            | 33.2                       | 0.04                        | 0.2                        | 0.2           | 0.0001 | 2.3                              |
| S6             | 26               | 15                | 407             | 79                          | 0.3             | 0.2             | 0.3            | 38.0                       | 0.05                        | 0.2                        | 0.3           | 0.0002 | 1.7                              |
| S7             | 22               | 10                | 376             | 65                          | 0.2             | 0.2             | 0.2            | 31.6                       | 0.04                        | 0.2                        | 0.2           | 0.0001 | 2.3                              |
| S8             | 22               | 13                | 376             | 70                          | 0.2             | 0.2             | 0.3            | 33.5                       | 0.04                        | 0.2                        | 0.2           | 0.0001 | 1.7                              |
| S9             | 36               | 22                | 407             | 98                          | 0.4             | 0.3             | 0.4            | 46.2                       | 0.06                        | 0.2                        | 0.3           | 0.0002 | 1.7                              |
| S10            | 80               | 57                | 939             | 234                         | 0.8             | 0.6             | 0.9            | 109.9                      | 0.13                        | 0.5                        | 0.8           | 0.0005 | 1.4                              |
| S11            | 49               | 39                | 532             | 147                         | 0.5             | 0.4             | 0.5            | 68.4                       | 0.08                        | 0.3                        | 0.5           | 0.0003 | 1.3                              |
| S12            | 161              | 73                | 1252            | 361                         | 1.4             | 1.0             | 1.3            | 169.6                      | 0.21                        | 0.8                        | 1.2           | 0.0007 | 2.2                              |
| S13            | 33               | 22                | 563             | 107                         | 0.4             | 0.3             | 0.4            | 51.5                       | 0.06                        | 0.3                        | 0.4           | 0.0002 | 1.5                              |
| S14            | 33               | 22                | 470             | 100                         | 0.4             | 0.3             | 0.4            | 47.7                       | 0.06                        | 0.2                        | 0.3           | 0.0002 | 1.5                              |
| S15            | 75               | 42                | 626             | 183                         | 0.7             | 0.5             | 0.7            | 85.7                       | 0.11                        | 0.4                        | 0.6           | 0.0004 | 1.8                              |
| S16            | 109              | 37                | 939             | 234                         | 0.9             | 0.6             | 0.9            | 111.3                      | 0.14                        | 0.5                        | 0.8           | 0.0005 | 2.9                              |
| S17            | 111              | 57                | 939             | 265                         | 1.0             | 0.7             | 1.0            | 124.2                      | 0.15                        | 0.6                        | 0.9           | 0.0005 | 2.0                              |
| S18            | 100              | 42                | 626             | 208                         | 0.8             | 0.6             | 0.8            | 97.1                       | 0.12                        | 0.5                        | 0.7           | 0.0004 | 2.4                              |
| S19            | 133              | 37                | 1252            | 283                         | 1.1             | 0.8             | 1.0            | 135.5                      | 0.17                        | 0.7                        | 1.0           | 0.0006 | 3.6                              |
| S20            | 136              | 57                | 1252            | 314                         | 1.2             | 0.8             | 1.2            | 148.4                      | 0.18                        | 0.7                        | 1.1           | 0.0006 | 2.4                              |
| S21            | 185              | 85                | 1283            | 406                         | 1.6             | 1.1             | 1.5            | 189.7                      | 0.23                        | 0.9                        | 1.3           | 0.0008 | 2.2                              |
| S22            | 88               | 53                | 1064            | 246                         | 0.9             | 0.7             | 0.9            | 116.3                      | 0.14                        | 0.6                        | 0.8           | 0.0005 | 1.6                              |
| S23            | 46               | 20                | 501             | 113                         | 0.4             | 0.3             | 0.4            | 53.7                       | 0.07                        | 0.3                        | 0.4           | 0.0002 | 2.3                              |
| S24            | 131              | 76                | 1440            | 350                         | 1.3             | 0.9             | 1.3            | 165.4                      | 0.20                        | 0.8                        | 1.2           | 0.0007 | 1.7                              |
| S25            | 163              | 81                | 1283            | 378                         | 1.5             | 1.0             | 1.4            | 177.0                      | 0.22                        | 0.9                        | 1.2           | 0.0008 | 2.0                              |
| S26            | 144              | 61                | 1283            | 330                         | 1.3             | 0.9             | 1.2            | 156.2                      | 0.19                        | 0.8                        | 1.1           | 0.0007 | 2.4                              |
| S27            | 482              | 57                | 376             | 592                         | 2.9             | 1.6             | 2.0            | 272.3                      | 0.33                        | 1.3                        | 1.8           | 0.0012 | 8.5                              |
| S28            | 238              | 93                | 1502            | 488                         | 2.0             | 1.3             | 1.8            | 228.1                      | 0.28                        | 1.1                        | 1.6           | 0.0010 | 2.6                              |
| S29            | 333              | 89                | 1471            | 574                         | 2.5             | 1.6             | 2.0            | 268.3                      | 0.33                        | 1.3                        | 1.9           | 0.0012 | 3.7                              |
| S30            | 275              | 57                | 1252            | 453                         | 2.0             | 1.2             | 1.6            | 212.9                      | 0.26                        | 1.0                        | 1.5           | 0.0009 | 4.8                              |
| S31            | 168              | 61                | 1315            | 356                         | 1.4             | 1.0             | 1.3            | 168.3                      | 0.21                        | 0.8                        | 1.2           | 0.0007 | 2.8                              |
| S32            | 309              | 74                | 1346            | 519                         | 2.2             | 1.4             | 1.8            | 242.7                      | 0.30                        | 1.2                        | 1.7           | 0.0010 | 4.2                              |
| S33            | 100              | 69                | 1002            | 276                         | 1.0             | 0.7             | 1.0            | 129.0                      | 0.16                        | 0.6                        | 0.9           | 0.0006 | 1.4                              |
| S34            | 642              | 53                | 939             | 791                         | 3.9             | 2.1             | 2.7            | 367.3                      | 0.45                        | 1.8                        | 2.5           | 0.0016 | 12.1                             |
| S35            | 149              | 85                | 1440            | 382                         | 1.4             | 1.0             | 1.4            | 179.6                      | 0.22                        | 0.9                        | 1.3           | 0.0008 | 1.8                              |
| S36            | 103              | 81                | 1221            | 313                         | 1.1             | 0.8             | 1.2            | 146.5                      | 0.18                        | 0.7                        | 1.0           | 0.0006 | 1.3                              |

|     |     |     |      |     |     |     |     |       |      |     |     |        |     |
|-----|-----|-----|------|-----|-----|-----|-----|-------|------|-----|-----|--------|-----|
| S37 | 104 | 69  | 1064 | 284 | 1.0 | 0.8 | 1.0 | 133.2 | 0.16 | 0.7 | 0.9 | 0.0006 | 1.5 |
| S38 | 46  | 30  | 689  | 141 | 0.5 | 0.4 | 0.5 | 67.2  | 0.08 | 0.3 | 0.5 | 0.0003 | 1.5 |
| S39 | 73  | 51  | 908  | 215 | 0.8 | 0.6 | 0.8 | 101.5 | 0.12 | 0.5 | 0.7 | 0.0004 | 1.4 |
| S40 | 114 | 61  | 1096 | 285 | 1.1 | 0.8 | 1.0 | 134.2 | 0.16 | 0.7 | 0.9 | 0.0006 | 1.9 |
| S41 | 222 | 85  | 1283 | 443 | 1.8 | 1.2 | 1.6 | 206.8 | 0.25 | 1.0 | 1.4 | 0.0009 | 2.6 |
| S42 | 173 | 76  | 1471 | 395 | 1.5 | 1.1 | 1.4 | 186.1 | 0.23 | 0.9 | 1.3 | 0.0008 | 2.3 |
| S43 | 274 | 183 | 1346 | 639 | 2.5 | 1.7 | 2.3 | 292.2 | 0.36 | 1.4 | 2.0 | 0.0013 | 1.5 |
| S44 | 99  | 74  | 1221 | 298 | 1.1 | 0.8 | 1.1 | 140.3 | 0.17 | 0.7 | 1.0 | 0.0006 | 1.3 |
| S45 | 222 | 57  | 814  | 366 | 1.6 | 1.0 | 1.3 | 170.4 | 0.21 | 0.8 | 1.2 | 0.0007 | 3.9 |
| S46 | 98  | 68  | 1471 | 308 | 1.1 | 0.8 | 1.2 | 146.6 | 0.18 | 0.7 | 1.0 | 0.0006 | 1.4 |
| S47 | 247 | 93  | 1409 | 489 | 2.0 | 1.3 | 1.8 | 228.3 | 0.28 | 1.1 | 1.6 | 0.0010 | 2.6 |
| S48 | 371 | 93  | 1346 | 608 | 2.6 | 1.6 | 2.2 | 282.8 | 0.35 | 1.4 | 2.0 | 0.0012 | 4.0 |
| S49 | 73  | 49  | 939  | 215 | 0.8 | 0.6 | 0.8 | 101.6 | 0.12 | 0.5 | 0.7 | 0.0004 | 1.5 |
| S50 | 22  | 17  | 344  | 74  | 0.3 | 0.2 | 0.3 | 34.9  | 0.04 | 0.2 | 0.2 | 0.0001 | 1.3 |
| S51 | 99  | 63  | 1127 | 276 | 1.0 | 0.7 | 1.0 | 130.1 | 0.16 | 0.6 | 0.9 | 0.0006 | 1.6 |
| S52 | 173 | 62  | 1002 | 338 | 1.4 | 0.9 | 1.2 | 158.2 | 0.19 | 0.8 | 1.1 | 0.0007 | 2.8 |
| S53 | 519 | 85  | 1502 | 756 | 3.4 | 2.0 | 2.7 | 352.7 | 0.43 | 1.7 | 2.4 | 0.0015 | 6.1 |
| S54 | 179 | 65  | 1409 | 380 | 1.5 | 1.0 | 1.4 | 179.7 | 0.22 | 0.9 | 1.3 | 0.0008 | 2.8 |
| S55 | 204 | 85  | 1534 | 444 | 1.7 | 1.2 | 1.6 | 208.5 | 0.26 | 1.0 | 1.5 | 0.0009 | 2.4 |
| S56 | 114 | 57  | 1096 | 279 | 1.1 | 0.8 | 1.0 | 131.7 | 0.16 | 0.6 | 0.9 | 0.0006 | 2.0 |
| S57 | 185 | 85  | 1283 | 406 | 1.6 | 1.1 | 1.5 | 189.7 | 0.23 | 0.9 | 1.3 | 0.0008 | 2.2 |
| S58 | 235 | 66  | 1440 | 440 | 1.8 | 1.2 | 1.6 | 207.2 | 0.25 | 1.0 | 1.5 | 0.0009 | 3.6 |
| S59 | 168 | 89  | 1315 | 397 | 1.5 | 1.1 | 1.4 | 185.4 | 0.23 | 0.9 | 1.3 | 0.0008 | 1.9 |
| S60 | 210 | 89  | 1409 | 446 | 1.8 | 1.2 | 1.6 | 208.7 | 0.26 | 1.0 | 1.5 | 0.0009 | 2.4 |
| S61 | 124 | 69  | 1096 | 307 | 1.2 | 0.8 | 1.1 | 143.7 | 0.18 | 0.7 | 1.0 | 0.0006 | 1.8 |
| S62 | 95  | 58  | 939  | 250 | 0.9 | 0.7 | 0.9 | 117.3 | 0.14 | 0.6 | 0.8 | 0.0005 | 1.6 |
| S63 | 32  | 28  | 532  | 113 | 0.4 | 0.3 | 0.4 | 53.3  | 0.07 | 0.3 | 0.4 | 0.0002 | 1.2 |
| S64 | 99  | 37  | 908  | 222 | 0.9 | 0.6 | 0.8 | 105.4 | 0.13 | 0.5 | 0.7 | 0.0005 | 2.6 |
| S65 | 94  | 68  | 876  | 259 | 1.0 | 0.7 | 0.9 | 120.5 | 0.15 | 0.6 | 0.9 | 0.0005 | 1.4 |
| S66 | 99  | 73  | 1127 | 290 | 1.1 | 0.8 | 1.1 | 136.0 | 0.17 | 0.7 | 1.0 | 0.0006 | 1.4 |
| S67 | 124 | 69  | 1252 | 319 | 1.2 | 0.9 | 1.2 | 150.1 | 0.18 | 0.7 | 1.1 | 0.0006 | 1.8 |
| S68 | 188 | 74  | 1283 | 392 | 1.6 | 1.1 | 1.4 | 184.0 | 0.23 | 0.9 | 1.3 | 0.0008 | 2.5 |
| S69 | 124 | 77  | 1440 | 345 | 1.3 | 0.9 | 1.3 | 162.7 | 0.20 | 0.8 | 1.2 | 0.0007 | 1.6 |
| S70 | 120 | 81  | 1064 | 318 | 1.2 | 0.9 | 1.2 | 148.0 | 0.18 | 0.7 | 1.0 | 0.0006 | 1.5 |
| S71 | 210 | 97  | 1471 | 463 | 1.8 | 1.2 | 1.7 | 216.2 | 0.27 | 1.1 | 1.5 | 0.0009 | 2.2 |
| S72 | 198 | 97  | 1471 | 450 | 1.8 | 1.2 | 1.6 | 210.5 | 0.26 | 1.0 | 1.5 | 0.0009 | 2.0 |
| S73 | 148 | 85  | 1346 | 374 | 1.4 | 1.0 | 1.4 | 175.1 | 0.21 | 0.9 | 1.2 | 0.0008 | 1.7 |
| S74 | 152 | 80  | 1315 | 368 | 1.4 | 1.0 | 1.3 | 172.4 | 0.21 | 0.8 | 1.2 | 0.0007 | 1.9 |

|      |      |     |      |      |     |     |     |       |      |     |     |        |      |
|------|------|-----|------|------|-----|-----|-----|-------|------|-----|-----|--------|------|
| S75  | 395  | 92  | 1002 | 604  | 2.7 | 1.6 | 2.1 | 279.1 | 0.34 | 1.4 | 1.9 | 0.0012 | 4.3  |
| S76  | 126  | 70  | 1440 | 337  | 1.3 | 0.9 | 1.3 | 159.7 | 0.20 | 0.8 | 1.1 | 0.0007 | 1.8  |
| S77  | 94   | 73  | 1346 | 302  | 1.1 | 0.8 | 1.1 | 142.7 | 0.17 | 0.7 | 1.0 | 0.0006 | 1.3  |
| S78  | 57   | 32  | 751  | 160  | 0.6 | 0.4 | 0.6 | 76.2  | 0.09 | 0.4 | 0.5 | 0.0003 | 1.8  |
| S79  | 58   | 37  | 814  | 174  | 0.6 | 0.5 | 0.7 | 82.7  | 0.10 | 0.4 | 0.6 | 0.0004 | 1.6  |
| S80  | 1087 | 89  | 250  | 1234 | 6.3 | 3.3 | 4.2 | 566.3 | 0.69 | 2.8 | 3.8 | 0.0024 | 12.2 |
| S81  | 114  | 69  | 1127 | 299  | 1.1 | 0.8 | 1.1 | 140.4 | 0.17 | 0.7 | 1.0 | 0.0006 | 1.6  |
| S82  | 115  | 57  | 1158 | 285  | 1.1 | 0.8 | 1.1 | 134.9 | 0.17 | 0.7 | 1.0 | 0.0006 | 2.0  |
| S83  | 136  | 77  | 1502 | 362  | 1.3 | 1.0 | 1.3 | 171.0 | 0.21 | 0.8 | 1.2 | 0.0007 | 1.8  |
| S84  | 333  | 73  | 1502 | 554  | 2.4 | 1.5 | 2.0 | 259.8 | 0.32 | 1.3 | 1.8 | 0.0011 | 4.6  |
| S85  | 115  | 81  | 1502 | 347  | 1.2 | 0.9 | 1.3 | 163.7 | 0.20 | 0.8 | 1.2 | 0.0007 | 1.4  |
| S86  | 126  | 85  | 1502 | 364  | 1.3 | 1.0 | 1.3 | 171.3 | 0.21 | 0.8 | 1.2 | 0.0007 | 1.5  |
| S87  | 259  | 89  | 1283 | 486  | 2.0 | 1.3 | 1.7 | 226.4 | 0.28 | 1.1 | 1.6 | 0.0010 | 2.9  |
| S88  | 173  | 82  | 1471 | 404  | 1.6 | 1.1 | 1.5 | 190.0 | 0.23 | 0.9 | 1.3 | 0.0008 | 2.1  |
| S89  | 148  | 81  | 1377 | 370  | 1.4 | 1.0 | 1.4 | 174.0 | 0.21 | 0.9 | 1.2 | 0.0007 | 1.8  |
| S90  | 38   | 22  | 501  | 109  | 0.4 | 0.3 | 0.4 | 51.7  | 0.06 | 0.3 | 0.4 | 0.0002 | 1.7  |
| S91  | 51   | 30  | 751  | 151  | 0.5 | 0.4 | 0.6 | 72.1  | 0.09 | 0.4 | 0.5 | 0.0003 | 1.7  |
| S92  | 121  | 73  | 1377 | 332  | 1.2 | 0.9 | 1.2 | 156.5 | 0.19 | 0.8 | 1.1 | 0.0007 | 1.7  |
| S93  | 1007 | 97  | 1221 | 1240 | 6.1 | 3.4 | 4.2 | 573.9 | 0.70 | 2.8 | 3.9 | 0.0025 | 10.3 |
| S94  | 185  | 76  | 1471 | 407  | 1.6 | 1.1 | 1.5 | 191.5 | 0.23 | 0.9 | 1.4 | 0.0008 | 2.5  |
| S95  | 119  | 93  | 1502 | 368  | 1.3 | 1.0 | 1.4 | 172.8 | 0.21 | 0.8 | 1.2 | 0.0007 | 1.3  |
| S96  | 121  | 70  | 1346 | 325  | 1.2 | 0.9 | 1.2 | 153.3 | 0.19 | 0.8 | 1.1 | 0.0007 | 1.7  |
| S97  | 161  | 81  | 1440 | 388  | 1.5 | 1.0 | 1.4 | 182.3 | 0.22 | 0.9 | 1.3 | 0.0008 | 2.0  |
| S98  | 122  | 77  | 1346 | 336  | 1.2 | 0.9 | 1.2 | 158.3 | 0.19 | 0.8 | 1.1 | 0.0007 | 1.6  |
| S99  | 148  | 81  | 1377 | 370  | 1.4 | 1.0 | 1.4 | 174.0 | 0.21 | 0.9 | 1.2 | 0.0007 | 1.8  |
| S100 | 107  | 61  | 939  | 267  | 1.0 | 0.7 | 1.0 | 124.9 | 0.15 | 0.6 | 0.9 | 0.0005 | 1.8  |
| S101 | 40   | 27  | 563  | 122  | 0.4 | 0.3 | 0.5 | 57.8  | 0.07 | 0.3 | 0.4 | 0.0002 | 1.5  |
| S102 | 371  | 53  | 1283 | 545  | 2.5 | 1.5 | 1.9 | 255.7 | 0.31 | 1.3 | 1.8 | 0.0011 | 7.0  |
| S103 | 1235 | 77  | 125  | 1355 | 7.0 | 3.7 | 4.5 | 622.3 | 0.76 | 3.1 | 4.2 | 0.0027 | 16.0 |
| S104 | 605  | 89  | 876  | 800  | 3.8 | 2.2 | 2.8 | 369.5 | 0.45 | 1.8 | 2.5 | 0.0016 | 6.8  |
| S105 | 117  | 77  | 1471 | 341  | 1.2 | 0.9 | 1.3 | 161.1 | 0.20 | 0.8 | 1.1 | 0.0007 | 1.5  |
| S106 | 1198 | 162 | 1659 | 1558 | 7.4 | 4.2 | 5.4 | 719.6 | 0.88 | 3.5 | 4.9 | 0.0031 | 7.4  |
| S107 | 121  | 89  | 1471 | 362  | 1.3 | 1.0 | 1.3 | 170.2 | 0.21 | 0.8 | 1.2 | 0.0007 | 1.4  |
| S108 | 154  | 85  | 1158 | 365  | 1.4 | 1.0 | 1.3 | 170.3 | 0.21 | 0.8 | 1.2 | 0.0007 | 1.8  |
| S109 | 231  | 82  | 1346 | 452  | 1.8 | 1.2 | 1.6 | 211.4 | 0.26 | 1.0 | 1.5 | 0.0009 | 2.8  |
| S110 | 41   | 35  | 783  | 150  | 0.5 | 0.4 | 0.6 | 71.8  | 0.09 | 0.4 | 0.5 | 0.0003 | 1.2  |
| S111 | 26   | 24  | 532  | 101  | 0.3 | 0.3 | 0.4 | 48.3  | 0.06 | 0.2 | 0.3 | 0.0002 | 1.1  |
| S112 | 25   | 11  | 376  | 69   | 0.3 | 0.2 | 0.3 | 33.2  | 0.04 | 0.2 | 0.2 | 0.0001 | 2.3  |
| S113 | 52   | 32  | 563  | 142  | 0.5 | 0.4 | 0.5 | 66.7  | 0.08 | 0.3 | 0.5 | 0.0003 | 1.6  |

|              |       |      |        |       |      |     |     |        |      |      |     |         |      |
|--------------|-------|------|--------|-------|------|-----|-----|--------|------|------|-----|---------|------|
| S114         | 642   | 77   | 1096   | 837   | 4.0  | 2.3 | 2.9 | 388.2  | 0.48 | 1.9  | 2.7 | 0.0017  | 8.3  |
| S115         | 152   | 81   | 1283   | 367   | 1.4  | 1.0 | 1.3 | 171.8  | 0.21 | 0.8  | 1.2 | 0.0007  | 1.9  |
| S116         | 741   | 82   | 1315   | 960   | 4.6  | 2.6 | 3.3 | 446.0  | 0.55 | 2.2  | 3.0 | 0.0019  | 9.0  |
| S117         | 163   | 69   | 1252   | 358   | 1.4  | 1.0 | 1.3 | 168.3  | 0.21 | 0.8  | 1.2 | 0.0007  | 2.4  |
| S118         | 185   | 89   | 1502   | 429   | 1.7  | 1.2 | 1.6 | 201.1  | 0.25 | 1.0  | 1.4 | 0.0009  | 2.1  |
| S119         | 78    | 49   | 783    | 208   | 0.8  | 0.6 | 0.8 | 97.5   | 0.12 | 0.5  | 0.7 | 0.0004  | 1.6  |
| S120         | 47    | 35   | 783    | 157   | 0.5  | 0.4 | 0.6 | 74.6   | 0.09 | 0.4  | 0.5 | 0.0003  | 1.4  |
| S121         | 69    | 50   | 845    | 206   | 0.7  | 0.6 | 0.8 | 97.0   | 0.12 | 0.5  | 0.7 | 0.0004  | 1.4  |
| S122         | 64    | 49   | 845    | 199   | 0.7  | 0.5 | 0.7 | 93.7   | 0.11 | 0.5  | 0.7 | 0.0004  | 1.3  |
| S123         | 58    | 44   | 783    | 181   | 0.6  | 0.5 | 0.7 | 85.4   | 0.10 | 0.4  | 0.6 | 0.0004  | 1.3  |
| S124         | 70    | 50   | 876    | 210   | 0.8  | 0.6 | 0.8 | 98.9   | 0.12 | 0.5  | 0.7 | 0.0004  | 1.4  |
| S125         | 54    | 35   | 720    | 159   | 0.6  | 0.4 | 0.6 | 75.5   | 0.09 | 0.4  | 0.5 | 0.0003  | 1.6  |
| S126         | 2100  | 162  | 250    | 2351  | 12.0 | 6.4 | 7.9 | 1078.3 | 1.32 | 5.3  | 7.2 | 0.0046  | 12.9 |
| S127         | 432   | 82   | 1409   | 657   | 2.9  | 1.8 | 2.3 | 306.7  | 0.38 | 1.5  | 2.1 | 0.0013  | 5.3  |
| S128         | 193   | 66   | 1346   | 390   | 1.6  | 1.1 | 1.4 | 183.9  | 0.23 | 0.9  | 1.3 | 0.0008  | 2.9  |
| S129         | 51    | 53   | 939    | 199   | 0.7  | 0.5 | 0.7 | 94.0   | 0.12 | 0.5  | 0.7 | 0.0004  | 1.0  |
| S130         | 78    | 42   | 563    | 182   | 0.7  | 0.5 | 0.7 | 84.5   | 0.10 | 0.4  | 0.6 | 0.0004  | 1.8  |
| S131         | 59    | 44   | 626    | 170   | 0.6  | 0.5 | 0.6 | 79.5   | 0.10 | 0.4  | 0.6 | 0.0003  | 1.4  |
| S132         | 48    | 37   | 563    | 145   | 0.5  | 0.4 | 0.5 | 67.9   | 0.08 | 0.3  | 0.5 | 0.0003  | 1.3  |
| S133         | 43    | 33   | 532    | 132   | 0.5  | 0.4 | 0.5 | 61.9   | 0.08 | 0.3  | 0.4 | 0.0003  | 1.3  |
| S134         | 44    | 28   | 501    | 123   | 0.5  | 0.3 | 0.5 | 58.0   | 0.07 | 0.3  | 0.4 | 0.0002  | 1.6  |
| S135         | 99    | 31   | 720    | 198   | 0.8  | 0.5 | 0.7 | 93.8   | 0.12 | 0.5  | 0.7 | 0.0004  | 3.2  |
| S136         | 101.3 | 50.3 | 719.9  | 228.7 | 0.9  | 0.6 | 0.8 | 106.7  | 0.13 | 0.5  | 0.7 | 0.0005  | 2.0  |
| Aver-<br>age | 192.5 | 62.7 | 1033.6 | 361.8 | 1.5  | 1.0 | 1.3 | 169.2  | 0.2  | 0.8  | 1.2 | 0.0007  | 2.7  |
| SD           | 267.8 | 28.6 | 382.3  | 298.2 | 1.5  | 0.8 | 1.0 | 137.0  | 0.2  | 0.7  | 0.9 | 0.0006  | 2.5  |
| W. A.        | 33.0  | 45.0 | 412.0  | 370.0 | <1   | <1  | 1.0 | 59.0   | 0.07 | 0.41 | 3.5 | 0.00029 | 3.5  |
